# Supplementary material
Source: PubMed Central journal article supplement (PMC8204142)
Supplement: Supplementary_Data.pdf [file Supplementary_Data.pdf]

Figure S1. Histopathological characteristics of gliomas. (A) Representative images of H&E-stained sections (magnification, x10) of astrocytoma and oligodendroglioma according to World Health Organization grades. (B) Immunohistochemistry staining (magnification, x10) of glioblastoma IDH-mut. H&E, hematoxylin and eosin stain; IDH, isocitrate dehydrogenase; IDH-mut, IDH-mutant; GFAP, glial fibrillary acidic protein.

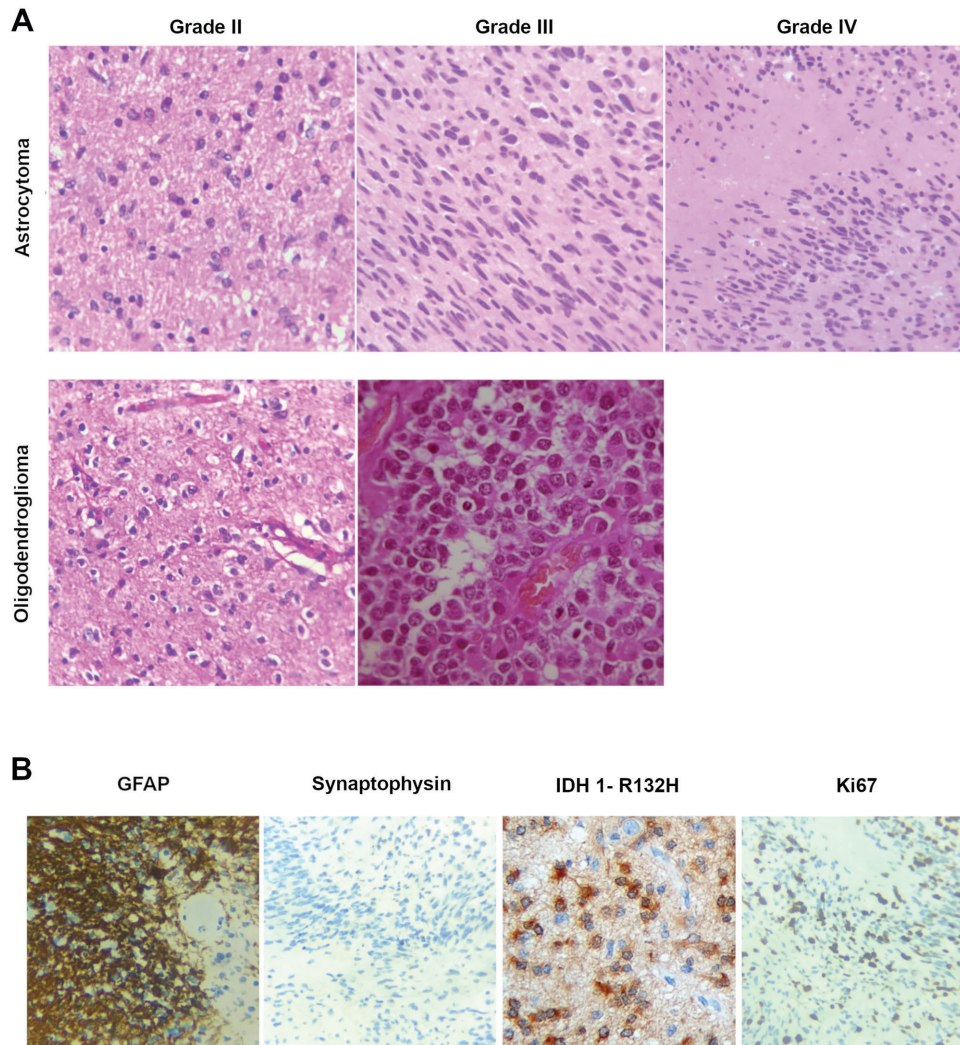

Table SI. Change of classification of the 119 cases.

| ID                  | WHO 2007 | WHO 2016                    | Changes in tumor grade | Changes in tumor histological type |
|---------------------|----------|-----------------------------|------------------------|------------------------------------|
| <b>Grade II</b>     |          |                             |                        |                                    |
| H11                 | A II     | A II IDH mut                | No                     | No                                 |
| H34                 | A II     | A II IDH mut                | No                     | No                                 |
| G25                 | A II     | A III IDH wt                | Yes                    | No                                 |
| G02                 | A II     | GBM IDH wt                  | Yes                    | Yes                                |
| G28                 | A II     | O II IDH mut y codel 1p19q  | No                     | Yes                                |
| Glio 06             | G II     | A II IDH mut                | No                     | Yes                                |
| Glio 13             | G II     | A II IDH mut                | No                     | Yes                                |
| Glio 15             | G II     | A II IDH wt                 | No                     | Yes                                |
| Glio 21             | G II     | A II IDH wt                 | No                     | Yes                                |
| Glio 04             | G II     | A III IDH wt                | Yes                    | Yes                                |
| Glio 19             | G II     | A III IDH wt                | Yes                    | Yes                                |
| G20                 | O II     | O III IDH mut y codel 1p19q | No                     | No                                 |
| Glio 09             | O II     | O II IDH mut y codel 1p19q  | No                     | No                                 |
| H29                 | O II     | O II IDH mut y codel 1p19q  | No                     | No                                 |
| H27                 | O II     | A II IDH mut                | No                     | Yes                                |
| M8961               | O II     | GBM IDH mut                 | Yes                    | Yes                                |
| Glio 03             | O II     | GBM IDH wt                  | Yes                    | Yes                                |
| <b>Grade III</b>    |          |                             |                        |                                    |
| H06                 | A III    | A III IDH mut               | No                     | No                                 |
| H20                 | A III    | A III IDH mut               | No                     | No                                 |
| H24                 | A III    | A III IDH mut               | No                     | No                                 |
| H41                 | A III    | A III IDH mut               | No                     | No                                 |
| H09                 | A III    | A III IDH wt                | No                     | No                                 |
| H30                 | A III    | A III IDH wt                | No                     | No                                 |
| H31                 | A III    | A III IDH wt                | No                     | No                                 |
| H48                 | A III    | A III IDH wt                | No                     | No                                 |
| G08                 | A III    | GBM IDH wt                  | Yes                    | Yes                                |
| M7463               | G III    | A III IDH mut               | No                     | Yes                                |
| Glio 22             | O III    | O III IDH mut y codel 1p19q | No                     | No                                 |
| H22                 | O III    | O III IDH mut y codel 1p19q | No                     | No                                 |
| G27                 | O III    | O II IDH mut y codel 1p19q  | No                     | No                                 |
| H18                 | O III    | A III IDH mut               | No                     | Yes                                |
| H21                 | O III    | A III IDH wt                | No                     | Yes                                |
| H45                 | O III    | A III IDH wt                | No                     | Yes                                |
| M8597               | O III    | A III IDH wt                | No                     | Yes                                |
| G10                 | O III    | GBM IDH wt                  | Yes                    | Yes                                |
| G24                 | O III    | GBM IDH wt                  | Yes                    | Yes                                |
| <b>Grade III/IV</b> |          |                             |                        |                                    |
| Glio 18             | A III/IV | GBM IDH wt                  | Yes                    | Yes                                |
| G30                 | A III-IV | GBM IDH wt                  | Yes                    | Yes                                |
| G33                 | A III-IV | GBM IDH wt                  | Yes                    | Yes                                |
| Glio 16             | G III/IV | GBM IDH mut                 | Yes                    | Yes                                |
| Glio 12             | G III/IV | GBM IDH wt                  | Yes                    | Yes                                |
| M8376               | G III/IV | GBM IDH wt                  | Yes                    | Yes                                |
| Glio 05             | G III/IV | O II IDH mut y codel p 19q  | Yes                    | Yes                                |
| <b>Grade IV</b>     |          |                             |                        |                                    |
| Glio 07             | GBM      | GBM IDH mut                 | No                     | No                                 |
| Glio 08             | GBM      | GBM IDH mut                 | No                     | No                                 |
| H15                 | GBM      | GBM IDH mut                 | No                     | No                                 |
| M7698               | GBM      | GBM IDH mut                 | No                     | No                                 |
| M7464               | GBM      | GBM IDH mut                 | No                     | No                                 |
| G01                 | GBM      | GBM IDH wt                  | No                     | No                                 |
| G03                 | GBM      | GBM IDH wt                  | No                     | No                                 |
| G05                 | GBM      | GBM IDH wt                  | No                     | No                                 |
| G09                 | GBM      | GBM IDH wt                  | No                     | No                                 |
| G11                 | GBM      | GBM IDH wt                  | No                     | No                                 |

Table SI. Continued.

| ID      | WHO 2007 | WHO 2016   | Changes in tumor grade | Changes in tumor histological type |
|---------|----------|------------|------------------------|------------------------------------|
| G12     | GBM      | GBM IDH wt | No                     | No                                 |
| G14     | GBM      | GBM IDH wt | No                     | No                                 |
| G15     | GBM      | GBM IDH wt | No                     | No                                 |
| G16     | GBM      | GBM IDH wt | No                     | No                                 |
| G17     | GBM      | GBM IDH wt | No                     | No                                 |
| G18     | GBM      | GBM IDH wt | No                     | No                                 |
| G21     | GBM      | GBM IDH wt | No                     | No                                 |
| G22     | GBM      | GBM IDH wt | No                     | No                                 |
| G23     | GBM      | GBM IDH wt | No                     | No                                 |
| G26     | GBM      | GBM IDH wt | No                     | No                                 |
| G29     | GBM      | GBM IDH wt | No                     | No                                 |
| G31     | GBM      | GBM IDH wt | No                     | No                                 |
| G32     | GBM      | GBM IDH wt | No                     | No                                 |
| G36     | GBM      | GBM IDH wt | No                     | No                                 |
| G37     | GBM      | GBM IDH wt | No                     | No                                 |
| G39     | GBM      | GBM IDH wt | No                     | No                                 |
| G40     | GBM      | GBM IDH wt | No                     | No                                 |
| G42     | GBM      | GBM IDH wt | No                     | No                                 |
| G43     | GBM      | GBM IDH wt | No                     | No                                 |
| G44     | GBM      | GBM IDH wt | No                     | No                                 |
| G45     | GBM      | GBM IDH wt | No                     | No                                 |
| G46     | GBM      | GBM IDH wt | No                     | No                                 |
| G47     | GBM      | GBM IDH wt | No                     | No                                 |
| G48     | GBM      | GBM IDH wt | No                     | No                                 |
| G49     | GBM      | GBM IDH wt | No                     | No                                 |
| Glio 01 | GBM      | GBM IDH wt | No                     | No                                 |
| Glio 02 | GBM      | GBM IDH wt | No                     | No                                 |
| Glio 10 | GBM      | GBM IDH wt | No                     | No                                 |
| Glio 11 | GBM      | GBM IDH wt | No                     | No                                 |
| Glio 14 | GBM      | GBM IDH wt | No                     | No                                 |
| Glio 20 | GBM      | GBM IDH wt | No                     | No                                 |
| H01     | GBM      | GBM IDH wt | No                     | No                                 |
| H02     | GBM      | GBM IDH wt | No                     | No                                 |
| H03     | GBM      | GBM IDH wt | No                     | No                                 |
| H05     | GBM      | GBM IDH wt | No                     | No                                 |
| H08     | GBM      | GBM IDH wt | No                     | No                                 |
| H10     | GBM      | GBM IDH wt | No                     | No                                 |
| H12     | GBM      | GBM IDH wt | No                     | No                                 |
| H13     | GBM      | GBM IDH wt | No                     | No                                 |
| H16     | GBM      | GBM IDH wt | No                     | No                                 |
| H17     | GBM      | GBM IDH wt | No                     | No                                 |
| H19     | GBM      | GBM IDH wt | No                     | No                                 |
| H23     | GBM      | GBM IDH wt | No                     | No                                 |
| H25     | GBM      | GBM IDH wt | No                     | No                                 |
| H26     | GBM      | GBM IDH wt | No                     | No                                 |
| H28     | GBM      | GBM IDH wt | No                     | No                                 |
| H32     | GBM      | GBM IDH wt | No                     | No                                 |
| H35     | GBM      | GBM IDH wt | No                     | No                                 |
| H36     | GBM      | GBM IDH wt | No                     | No                                 |
| H37     | GBM      | GBM IDH wt | No                     | No                                 |
| H38     | GBM      | GBM IDH wt | No                     | No                                 |
| H40     | GBM      | GBM IDH wt | No                     | No                                 |
| H42     | GBM      | GBM IDH wt | No                     | No                                 |
| H43     | GBM      | GBM IDH wt | No                     | No                                 |
| H44     | GBM      | GBM IDH wt | No                     | No                                 |
| H46     | GBM      | GBM IDH wt | No                     | No                                 |
| H47     | GBM      | GBM IDH wt | No                     | No                                 |
| H49     | GBM      | GBM IDH wt | No                     | No                                 |

Table SI. Continued.

| ID     | WHO 2007       | WHO 2016     | Changes in tumor grade | Changes in tumor histological type |
|--------|----------------|--------------|------------------------|------------------------------------|
| H50    | GBM            | GBM IDH wt   | No                     | No                                 |
| M7465  | GBM            | GBM IDH wt   | No                     | No                                 |
| M7545  | GBM            | GBM IDH wt   | No                     | No                                 |
| M7558  | GBM            | GBM IDH wt   | No                     | No                                 |
| M7816  | GBM            | GBM IDH wt   | No                     | No                                 |
| Others |                |              |                        |                                    |
| G19    | OA             | A II IDH mut | No                     | Yes                                |
| G35    | LGG vs gliosis | A II IDH mut | No                     | Yes                                |
| H39    | LGG vs gliosis | A II IDH mut | No                     | Yes                                |

A, astrocytoma; G, glioma; O, oligodendroglioma; OA, oligoastrocytoma; GBM, glioblastoma; LGG, low grade glioma; IDH, isocitrate dehydrogenase; wt, wild-type; mut, mutant; WHO, World Health Organization.
